# Supplementary material
Source: PubMed Central journal article supplement (PMC10913928)
Supplement: JCOPDF-11-121-s001.pdf [file JCOPDF-11-121-s001.pdf]

## **Online Data Supplement**

### **Pulmonary Rehabilitation for Chronic Obstructive Pulmonary Disease Patients With Underlying Alpha-1 Antitrypsin Deficiency: A Systematic Review and Practical Recommendations**

Fawaz A. Alwadani<sup>1,2</sup> Kyrie Wheeler<sup>3</sup> Harriet Pittaway<sup>4</sup> Alice M. Turner, MBChB, PhD<sup>1</sup>

<sup>1</sup> Institute for Applied Health Research, University of Birmingham, Birmingham, United Kingdom

<sup>2</sup> Department of Physical Therapy, Jazan University, Jazan, Saudi Arabia

<sup>3</sup> Heartlands Hospital, Birmingham, United Kingdom

<sup>4</sup> Institute of Inflammation and Ageing, University of Birmingham, Birmingham, United Kingdom

**Table 1: Search concepts for the systematic review**

| <b>Concept 1: alpha 1-Antitrypsin</b>                                                                                                                                                                                                                                                                                                                                                                                                                                                                                                                                                                        | <b>Concept 2: Pulmonary Rehabilitation</b>                                                                                                                                                                                                                                                                                                                                                                                                                                                                                                                                                                                                                                                                                                                                                                                                                                                 | <b>Concept 3: Skeletal Muscle morphology</b>                                                                                                                                                                                                                                                                                                                                                                                                                                                                                                                                                                                                                                                                                                                         |
|--------------------------------------------------------------------------------------------------------------------------------------------------------------------------------------------------------------------------------------------------------------------------------------------------------------------------------------------------------------------------------------------------------------------------------------------------------------------------------------------------------------------------------------------------------------------------------------------------------------|--------------------------------------------------------------------------------------------------------------------------------------------------------------------------------------------------------------------------------------------------------------------------------------------------------------------------------------------------------------------------------------------------------------------------------------------------------------------------------------------------------------------------------------------------------------------------------------------------------------------------------------------------------------------------------------------------------------------------------------------------------------------------------------------------------------------------------------------------------------------------------------------|----------------------------------------------------------------------------------------------------------------------------------------------------------------------------------------------------------------------------------------------------------------------------------------------------------------------------------------------------------------------------------------------------------------------------------------------------------------------------------------------------------------------------------------------------------------------------------------------------------------------------------------------------------------------------------------------------------------------------------------------------------------------|
| 1 alpha 1-Antitrypsin/<br>2 alpha-1 antitrypsin.ti,ab.<br>3 alpha 1 antitrypsin.ti,ab.<br>4 alpha1 antitrypsin.ti,ab.<br>5 alpha-1-at.ti,ab.<br>6 alpha-1-antitrypsin.ti,ab.<br>7 alpha one antitrypsin.ti,ab.<br>8 alpha one antitrypsin.ti,ab.<br>9 AAT.ti,ab.<br>10 A1AT.ti,ab.<br>11 AATD.ti,ab.<br>12 deficient\$ or lack\$.ti,ab.<br>13 alpha 1-Antitrypsin<br>Deficiency/<br>14 alpha 1-Antitrypsin<br>Deficiency.mp<br>15 AATD.mp.<br>16 Augmentation therapy/<br>17 Augmentation<br>therap\$.ti,ab.<br><br>18 or/ 1 to 11<br>19 12 and 18<br>20 13 or 14 or 15<br>21 16 or 17<br>22. 19 or 20 or 21 | 1 Pulmonary Rehabilitation/<br>2 Pulmonary rehab\$.ti,ab.<br>3 Telerehabilitation/<br>4 telerehab\$.ti,ab.<br>5 tele-rehab\$.ti,ab.<br>6 virtual rehab\$.ti,ab<br>6 distance rehab\$.ti,ab.<br>7 remote rehab\$.ti,ab.<br>8 online rehab\$.ti,ab.<br>9 Conventional rehab\$.ti,ab.<br>10 face to face rehab\$.ti,ab.<br>11 face-to-face rehab\$.ta,ab.<br>12 Supervised rehab\$.ti,ab.<br>13 exercise therapy/<br>14 exercise therap\$.ti,ab.<br>15 exercise training/<br>16 exercise train\$.ti,ab.<br>17 Exercise\$.mp<br>18 aerobic exercise\$.ti,ab.<br>19 strength exercise\$.ti,ab.<br>20. endurance exercise\$.ti,ab.<br><br>21. resistance exercise\$.ti,ab.<br>22. aerobic train\$.ti,ab.<br>23 strength train\$.ti,ab<br>24. endurance train\$.ti,ab.<br><br>25 or/ 1 to 12<br><br>26 13 or 14 or 15 or 16 or 17 or 18 or<br>19 or 20 or 21 or 22 or 23 or 24<br><br>24 25 or 26 | 1 Skeletal muscle\$/<br>2 Skeletal<br>muscle\$.ti,ab.<br>3 Myofiber\$.ti,ab.<br>4 Myofibre\$.ti,ab.<br>5 Sarcomere\$/<br>6 Muscle fibre\$/<br>7 Muscle fiber\$/<br>8 Muscle fiber\$.ti,ab.<br>9 Muscle fibre\$.ti,ab.<br>10 Fast twitch.ti,ab.<br>11 Fast-twitch.ti,ab.<br>12 Slow twitch.ti,ab.<br>13 Slow-twitch.ti,ab.<br>14 Muscle Fiber\$ Type<br>I.ti,ab.<br>15 Muscle Fiber\$ Type<br>II.ti,ab.<br><br>16 Slow<br>oxidative.ti,ab.<br>17 Slow-<br>oxidative.ti,ab.<br>19 Fast glycolytic.ti,ab.<br>20 Fast-<br>glycolytic.ti,ab.<br>21 hybrid fibre\$.ti,ab.<br>22 hybrid fiber\$.ti,ab.<br>23 hybrid-fiber\$.ti,ab.<br>24 hybrid-fibre\$.ti,ab.<br><br>23 or 1 to 24<br><br>24 Muscle biopsy/<br>25 Muscle biops\$.mp.<br><br>26 24 or 25<br><br>27 23 or 26 |

**Table 2: Quality assessment using the Cochrane Risk of Bias in Non-randomized Studies of Interventions (ROBINS-I) assessment tool**

| Risk of bias                | <b>Bias due to confounding</b>                                                                                                                                                                 | <b>Bias in selection of participants</b>                                                                                                                                                                                | <b>Bias of classification of interventions</b>                                             | <b>Bias due to deviation from intended intervention</b>                                          | <b>Bias due to missing data</b>                            | <b>Bias in measurement of outcomes</b>                                                                                                                                         | <b>Bias in selection of the reported result</b>                             | <b>Overall</b>                                                                   |
|-----------------------------|------------------------------------------------------------------------------------------------------------------------------------------------------------------------------------------------|-------------------------------------------------------------------------------------------------------------------------------------------------------------------------------------------------------------------------|--------------------------------------------------------------------------------------------|--------------------------------------------------------------------------------------------------|------------------------------------------------------------|--------------------------------------------------------------------------------------------------------------------------------------------------------------------------------|-----------------------------------------------------------------------------|----------------------------------------------------------------------------------|
| <b>Jarosch et al 2017</b>   | Serious                                                                                                                                                                                        | No information                                                                                                                                                                                                          | N/A                                                                                        | No information                                                                                   | No information                                             | Low/moderate                                                                                                                                                                   | No information                                                              | Serious risk                                                                     |
| <b>Support for judgment</b> | Many baseline characteristics show no significant difference. Where there is difference, propensity score matching ensured evenly matched groups. No information reported as to co-morbidities | More information needed: Cant find exclusion criteria listed- although referenced. No details as to start/finish of patient contact- can't confirm overlap. Not enough information onto selection/recruitment criteria. | Interventional status is well defined; however, each group received the same intervention. | Intervention described in referenced paper (3). More information needed on adherence to program. | No information given as to the potential for missing data. | Measurements comparable across groups, unlikely to be impacted by knowledge of intervention from participant. As only one intervention, assessors likely to know intervention. | No information given as to registration of study and initial full data set. | Serious risk in one domain, no information in several. Some information missing. |

|                             |                                                                                                                            |                                                                                                                                                                      |                                                                                          |                                                                                                                            |                                                                                                                                                                                                                         |                                                                                                                                  |                                                                                                                                                                                                                                                      |                                             |
|-----------------------------|----------------------------------------------------------------------------------------------------------------------------|----------------------------------------------------------------------------------------------------------------------------------------------------------------------|------------------------------------------------------------------------------------------|----------------------------------------------------------------------------------------------------------------------------|-------------------------------------------------------------------------------------------------------------------------------------------------------------------------------------------------------------------------|----------------------------------------------------------------------------------------------------------------------------------|------------------------------------------------------------------------------------------------------------------------------------------------------------------------------------------------------------------------------------------------------|---------------------------------------------|
| <b>Kenn et al 2015</b>      | Low                                                                                                                        | Low                                                                                                                                                                  | N/A                                                                                      | Low                                                                                                                        | Moderate                                                                                                                                                                                                                | Low/moderate                                                                                                                     | Low                                                                                                                                                                                                                                                  | Moderate risk                               |
| <b>Support for judgment</b> | No information as to co-morbidities-SF-36 used to understand baseline.                                                     | Consecutive patients recruited. No exclusion criteria (other than not able to complete baseline measurements).                                                       | All participants undertook same program. Some individually structured strength training. | No data as to number of participants who did not complete. Reference to 10% of participants not having a final evaluation. | Large amounts of missing data points: 91 missing data points for 6MWT, and 345 missing data points for the SF36, and participants with missing data were removed from the analysis. 902 start 466 included in analysis. | Objective outcome measures, not likely to have been influenced. As only one intervention, assessors likely to know intervention. | The outcome measures were consistent for both groups, and different regression models were used to identify covariates that influence the regression coefficient. The final analysis included covariates that significantly contributed to the model | Mostly low, with one moderate               |
| <b>Jarosch et al 2016</b>   | Serious                                                                                                                    | Serious                                                                                                                                                              | N/A                                                                                      | No information                                                                                                             | Serious                                                                                                                                                                                                                 | Low/moderate                                                                                                                     | Moderate                                                                                                                                                                                                                                             | Serious risk                                |
| <b>Support for judgment</b> | No information reported as to co-morbidities, or no substitute reporting used.. Referene given to matched baseline groups. | Study registered prior to starting- however exclusion criteria changed from registered. 20 reported as enrolled on clinicaltrials.gov, only 19 discussed- 1 missing. | All participants undertook the same structured training program.                         | No data as to completion rates                                                                                             | No information given as to missing data/drop out of participants. 20 reported as enrolled on clinicaltrials.gov, only 19 discussed- 1 missing.                                                                          | Outcome measure not influenced- as only one intervention, assessors likely to know intervention.                                 | Reported results not all registered prior to study. Outcome measures same for both groups.                                                                                                                                                           | Some serious risk. Some missing information |

|                             |                                                                                                                      |                                                                                               |                                                                  |                                |                                                                                |                                                                    |                                                                                                |                                              |
|-----------------------------|----------------------------------------------------------------------------------------------------------------------|-----------------------------------------------------------------------------------------------|------------------------------------------------------------------|--------------------------------|--------------------------------------------------------------------------------|--------------------------------------------------------------------|------------------------------------------------------------------------------------------------|----------------------------------------------|
| <b>Olfert et al 2014</b>    | Low                                                                                                                  | Low/moderate                                                                                  | N/A                                                              | No information                 | No information                                                                 | Low                                                                | Low                                                                                            | Moderate                                     |
| <b>Support for judgment</b> | No details as to co-morbidities, but large amount of exclusion criteria which will result in mostly cohesive groups. | No reference made to study registration. Participants recruited through advertising campaign. | All participants undertook the same structured training program. | No data as to completion rates | No information on amount of people who completed. No registration information. | The protocol of outcomes measurement was unified across all groups | No evidence of selective reporting, though no published protocol was identified for this study | One moderate risk, some missing information. |

**Table 3: Quality assessment using the Cochrane risk-of-bias tool for randomized trials (RoB) assessment tool**

| Risk of Bias                | <b>Bias arising from the randomization process</b>       | <b>Bias arising from the intended intervention</b> | <b>Bias arising from missing outcome data</b>                                            | <b>Bias arising from measurement of the outcome</b>                             | <b>Bias arising from the selection of reported result</b> | <b>Overall risk</b>                               |
|-----------------------------|----------------------------------------------------------|----------------------------------------------------|------------------------------------------------------------------------------------------|---------------------------------------------------------------------------------|-----------------------------------------------------------|---------------------------------------------------|
| <b>Choate et al 2021</b>    | Low risk                                                 | Low risk                                           | Low risk                                                                                 | Low risk                                                                        | Some concerns                                             | Some concerns                                     |
| <b>Support for judgment</b> | Double blind randomized-Randomization methods explained. | Double blind                                       | 500 enrolled, 429 submitted 2 minimum data levels. Dropout rates similar for both groups | Data analysis workers randomized. Same methods of analysis used for each group. | No prespecified plan of analysis                          | Mostly low risk, but one area with some concerns. |
